# Supplementary material for: What’s Driving High Disenrollment in Medicare Advantage?
Source: PubMed Central journal article supplement — Inquiry. 2019 Apr 15;56:0046958019841506. doi: 10.1177/0046958019841506 (PMC6466458; doi:10.1177/0046958019841506), 2019-04-15
Supplement: Supplemental_Material.pdf [file Supplemental_Material.pdf]

Appendix Table 1. Mean Disenrollment Rates by Contract Characteristics, 2015-2017

|                                     | Disenrollment Rates<br>Mean (SE) |
|-------------------------------------|----------------------------------|
| <b>Star Rating</b>                  |                                  |
| 4-5 Stars                           | 7.6 (5.5)                        |
| 3-3.5 Stars                         | 12.8 (7)                         |
| 2-2.5 Stars                         | 21.7 (9.5)                       |
| Not Reported                        | 19.8 (19)                        |
| <b>Plan Type</b>                    |                                  |
| HMO                                 | 11.4 (7.8)                       |
| PPO                                 | 8.6 (5.6)                        |
| <b>Tax Status</b>                   |                                  |
| For-Profit                          | 8.1 (6.7)                        |
| Non-Profit                          | 12.1 (7.4)                       |
| <b>Categorical Adjustment Index</b> |                                  |
| Low                                 | 8.1 (5.9)                        |
| High                                | 13.3 (7.8)                       |
| <b>Enrollment</b>                   |                                  |
| <5000                               | 13.3 (9.2)                       |
| 5000-9999                           | 11.7 (6.8)                       |
| 10000-19999                         | 9.4 (6.5)                        |
| 20000+                              | 9.2 (6)                          |
| <b>Years</b>                        |                                  |
| <5 years                            | 15.1 (8.3)                       |
| 5-9 years                           | 11.7 (6.4)                       |
| 10-19 years                         | 9 (6.3)                          |
| 20+                                 | 7.9 (7.2)                        |
| <b>SNP</b>                          |                                  |
| No                                  | 10 (7.1)                         |
| Yes                                 | 11.5 (7.6)                       |
| <b>Study Year</b>                   |                                  |
| 2015                                | 11.3 (7.6)                       |
| 2016                                | 10.8 (7.2)                       |
| 2017                                | 10.2 (7.4)                       |

Appendix Table 2. Association between Medicare Advantage Contract-Level Reason for Disenrollment and Contract Characteristics, 2015-2017

|                                                | <b>Problems Getting Needed Care, Coverage, and Cost Information</b> | <b>Problems with Coverage of Doctors and Hospitals</b> | <b>Financial Reasons for Disenrollment</b> | <b>Problems with Prescription Drug Benefits and Coverage</b> | <b>Problems Getting Information about Prescription Drugs</b> |
|------------------------------------------------|---------------------------------------------------------------------|--------------------------------------------------------|--------------------------------------------|--------------------------------------------------------------|--------------------------------------------------------------|
| <b>Star Rating (ref: 4-5 Stars)</b>            |                                                                     |                                                        |                                            |                                                              |                                                              |
| 3-3.5 Stars                                    | 3.35<br>(2.41,4.30)                                                 | 3.05<br>(1.51,4.58)                                    | 0.8 (-<br>0.50,2.11)                       | 0.99<br>(0.27,1.72)                                          | 1.48<br>(0.80,2.16)                                          |
| 2-2.5 Stars                                    | 7.26<br>(4.89,9.64)                                                 | 9.06<br>(5.22,12.90)                                   | 1.11 (-<br>2.15,4.38)                      | 2.83<br>(1.01,4.65)                                          | 3.94<br>(2.24,5.63)                                          |
| <b>Plan Type (ref: HMO)</b>                    | -3.98 (-<br>5.16,-2.80)                                             | -8.37 (-10.29,-<br>6.45)                               | 11.19<br>(9.56,12.82)                      | -0.06 (-<br>0.96,0.83)                                       | -1.79 (-<br>2.63,-0.94)                                      |
| <b>Tax Status (ref: for-profit)</b>            | -3.81 (-<br>4.75,-2.87)                                             | -4.03 (-5.56,-<br>2.51)                                | 4.36<br>(3.06,5.66)                        | -2.07 (-<br>2.78,-1.36)                                      | -2.56 (-<br>3.23,-1.88)                                      |
| <b>Categorical Adjustment Index (ref: low)</b> | 0.93 (-<br>0.22,2.08)                                               | 2.53<br>(0.67,4.40)                                    | -4.62 (-<br>6.20,-3.03)                    | 1.67<br>(0.78,2.56)                                          | 0.86<br>(0.03,1.68)                                          |
| <b>Enrollment (ref: &lt;5000)</b>              |                                                                     |                                                        |                                            |                                                              |                                                              |
| 5000-9999                                      | -1.17 (-<br>2.60,0.26)                                              | -1.18 (-<br>3.50,1.13)                                 | -0.44 (-<br>2.40,1.53)                     | 0.82 (-<br>0.29,1.93)                                        | -0.74 (-<br>1.76,0.29)                                       |
| 10000-19999                                    | -2.49 (-<br>4.02,-0.95)                                             | -1.33 (-<br>3.81,1.15)                                 | -0.87 (-<br>2.98,1.24)                     | -0.12 (-<br>1.30,1.06)                                       | -1.6 (-2.70,-<br>0.50)                                       |
| 20000+                                         | -1.67 (-<br>3.06,-0.29)                                             | -1.06 (-<br>3.30,1.18)                                 | 0.05 (-<br>1.85,1.95)                      | 0.59 (-<br>0.48,1.65)                                        | -1.19 (-<br>2.18,-0.20)                                      |
| <b>Years (ref: 20+)</b>                        |                                                                     |                                                        |                                            |                                                              |                                                              |
| <5 years                                       | -2.77 (-<br>4.14,-1.39)                                             | -4.72 (-6.94,-<br>2.49)                                | 2.94<br>(1.05,4.83)                        | -0.72 (-<br>1.79,0.34)                                       | -1.37 (-<br>2.36,-0.39)                                      |
| 5-9 years                                      | -4.53 (-<br>5.86,-3.19)                                             | -6.52 (-8.69,-<br>4.36)                                | 3.67<br>(1.83,5.51)                        | -1.46 (-<br>2.52,-0.41)                                      | -2.38 (-<br>3.34,-1.42)                                      |
| 10-19 years                                    | -3.41 (-<br>5.07,-1.75)                                             | -5.59 (-8.28,-<br>2.91)                                | 7.03<br>(4.74,9.31)                        | -1.05 (-<br>2.34,0.24)                                       | -1.7 (-2.88,-<br>0.51)                                       |
| <b>SNP (ref: No)</b>                           | 1.71<br>(0.65,2.77)                                                 | 1.15 (-<br>0.58,2.87)                                  | -2.69 (-<br>4.15,-1.22)                    | 0.56 (-<br>0.26,1.38)                                        | 2.02<br>(1.25,2.78)                                          |
| <b>N</b>                                       | 953                                                                 | 954                                                    | 955                                        | 775                                                          | 938                                                          |

Note. HMO = health maintenance organization; PPO = preferred provider organization SE = Standard Error; SNP = Special Needs Plan. Coefficients were estimated using a linear regression model.

Appendix Table 3. Survey Items Assessing Reasons for Disenrollment

|                                                                            | Survey Items                                                                                                                                                                                                                                                                                                                                                                                                                                                                                                                                             |
|----------------------------------------------------------------------------|----------------------------------------------------------------------------------------------------------------------------------------------------------------------------------------------------------------------------------------------------------------------------------------------------------------------------------------------------------------------------------------------------------------------------------------------------------------------------------------------------------------------------------------------------------|
| <p><b>Problems Getting Needed Care, Coverage, and Cost Information</b></p> | <p>(a) Did you leave the plan because you were frustrated by the plan's approval process for care, tests, or treatment?<br/>           (b) Did you leave the plan because you had problems getting the care, tests, or treatment you needed?<br/>           (c) Did you leave the plan because you had problems getting the plan to pay a claim?<br/>           (d) Did you leave the plan because it was hard to get information from the plan -- like which health care services were covered or how much a specific test or treatment would cost?</p> |
| <p><b>Problems with Coverage of Doctors and Hospitals</b></p>              | <p>(a) Did you leave the plan because the doctors or other health care providers you wanted to see did not belong to the plan?<br/>           (b) Did you leave the plan because clinics or hospitals you wanted to go to for care were not covered by the plan?</p>                                                                                                                                                                                                                                                                                     |
| <p><b>Financial Reasons for Disenrollment</b></p>                          | <p>(a) Did you leave the plan because the monthly fee that the health plan charges to provide coverage for health care and prescription medicines went up?<br/>           (b) Did you leave the plan because the dollar amount you had to pay each time you filled or refilled a prescription went up?<br/>           (c) Did you leave the plan because you found a health plan that costs less?<br/>           (d) Did you leave the plan because a change in your personal finances meant you could no longer afford the plan?</p>                    |
| <p><b>Problems with Prescription Drug Benefits and Coverage</b></p>        | <p>(a) Did you leave the plan because they changed the list of prescription medicines they cover?<br/>           (b) Did you leave the plan because the plan refused to pay for a medicine your doctor prescribed?<br/>           (c) Did you leave the plan because you had problems getting the medicines your doctor prescribed?<br/>           (d) Did you leave the plan because it was difficult to get brand name medicines?<br/>           (e) Did you leave the plan because you were</p>                                                       |

|                                                              |                                                                                                                                                                                                                                                                                                                                                                                                                                                                                                                                                                                                                                                                             |
|--------------------------------------------------------------|-----------------------------------------------------------------------------------------------------------------------------------------------------------------------------------------------------------------------------------------------------------------------------------------------------------------------------------------------------------------------------------------------------------------------------------------------------------------------------------------------------------------------------------------------------------------------------------------------------------------------------------------------------------------------------|
|                                                              | frustrated by the plan's approval process for medicines your doctor prescribed that were not on the plan's list of medicines that the plan covers?                                                                                                                                                                                                                                                                                                                                                                                                                                                                                                                          |
| <b>Problems Getting Information about Prescription Drugs</b> | <p>(a) Did you leave the plan because you did not know whom to contact when you had a problem filling or refilling a prescription?</p> <p>(b) Did you leave the plan because it was hard to get information from the plan -- like which prescription medicines were covered or how much a specific medicine would cost?</p> <p>(c) Did you leave the plan because you were unhappy with how the plan handled a question or complaint?</p> <p>(d) Did you leave the plan because you could not get the information or help you needed from the plan?</p> <p>(e) Did you leave the plan because their customer service staff did not treat you with courtesy and respect?</p> |

Source: Medicare 2017 Part C & D Display Measure Technical Notes
